# Supplementary material
Source: PubMed Central journal article supplement (PMC5795082)
Supplement: AEM.01733-17_zam004188308s1.pdf [file AEM.01733-17_zam004188308s1.pdf]

Supplementary Table S1.: CRISPR analysis of *S. thermophilus* STA and derived BIMs. All plasmid-containing and cured derivatives contained identical CRISPR spacer numbers and content to the parent strains (or relevant BIMs) from which they were derived (Supplementary Table S1).

| Strain   | CRISPR1 (bp) | #spacers | CRISPR2 (bp) | #spacers | CRISPR3 (bp) | #spacers | CRISPR4 (bp) | #spacers |
|----------|--------------|----------|--------------|----------|--------------|----------|--------------|----------|
| STA      | 2409         | 36       | 107          | 1        | 1358         | 20       | Not detected | N/A      |
| STA BIM1 | 2475         | 37       | 107          | 1        | 1358         | 20       | “            | “        |
| STA BIM2 | 2409         | 36       | 107          | 1        | 1358         | 20       | “            | “        |

Supplementary Table S2. CRISPR analysis of *S. thermophilus* STB and derived BIMs. All plasmid-containing derivatives contained identical CRISPR spacer numbers and content to the parent strains or BIMs from which they were derived (Supplementary Table S1).

| Strain   | CRISPR1 (bp) | #spacers | CRISPR2 (bp) | #spacers | CRISPR3 (bp) | #spacers | CRISPR4 (bp) | #spacers |
|----------|--------------|----------|--------------|----------|--------------|----------|--------------|----------|
| STB      | 2146         | 32       | 258          | 3        | 827          | 12       | 762          | 12       |
| STB BIM1 | 2146         | 32       | 258          | 3        | 893          | 13       | 762          | 12       |
| STB BIM2 | 2212         | 33       | 258          | 3        | 893          | 13       | 762          | 12       |
| STB BIM3 | 2146         | 32       | 258          | 3        | 827          | 12       | 762          | 12       |

Supplementary Table S3. Observed incidence of CRISPR spacer addition during BIM generation using STB and its CRISPR-Cas silenced derivatives.

| BIMs origin        | #BIMs analysed | #CRISPR1 | #CRISPR3 | #CRISPR4 | #CRISPR1+3 | #No alterations |
|--------------------|----------------|----------|----------|----------|------------|-----------------|
| STB                | 10             | 7 (70%)  | 1 (10%)  | 0 (0%)   | 2 (20%)    | 0 (0%)          |
| STB::pNZ44         | 10             | 7 (70%)  | 2 (20%)  | 0 (0%)   | 1 (10%)    | 0 (0%)          |
| STB::pNZ44+Csn2-1i | 6              | 0 (0%)   | 4 (66%)  | 0 (0%)   | 0 (0%)     | 2 (33%)         |
| STB::pNZ44+2Csn1   | 10             | 4 (40%)  | 1 (10%)  | 0 (0%)   | 0 (0%)     | 5 (50%)         |

Supplementary Table S4. Efficiencies of plaquing (EOPs) of phages 9851, 9853 and 9854 on STBWT and STB BIM3.

|          | 9851                             | 9853            | 9854                             |
|----------|----------------------------------|-----------------|----------------------------------|
| STB      | 1                                | 1               | 1                                |
| STB BIM3 | $9.68 (\pm 10.8) \times 10^{-6}$ | $0.27 \pm 0.05$ | $3.20 (\pm 4.35) \times 10^{-5}$ |

Supplementary Table S5. Adsorption analysis of *S. thermophilus* STB and derived CRISPR and non-CRISPR mediated BIMs.

| Strain/BIM | Adsorption of phage 9854 (%) | p-value |
|------------|------------------------------|---------|
| STB        | $90.4 \pm 2.7$               |         |
| STB BIM3   | $69.6 \pm 10.9$              | 0.059   |

Supplementary Table S6. CRISPR analysis of all derivatives of STA and STB, including plasmid controls and cured derivatives.

| Plasmid-containing derivative | CRISPR1 (bp) | #spacers | CRISPR2 (bp) | #spacers | CRISPR3 (bp) | #spacers | CRISPR4 (bp) | #spacers |
|-------------------------------|--------------|----------|--------------|----------|--------------|----------|--------------|----------|
| STA BIM1::pNZ44               | 2475         | 37       | 107          | 1        | 1358         | 20       | Not detected | N/A      |
| STA BIM1::Cas9i               | 2475         | 37       | 107          | 1        | 1358         | 20       | “            | “        |
| STA BIM1::Cas9i (cured)       | 2475         | 37       | 107          | 1        | 1358         | 20       | “            | “        |
| STA BIM2::Cas9i               | 2409         | 36       | 107          | 1        | 1358         | 20       | “            | “        |
| STB::pNZ44                    | 2146         | 32       | 258          | 3        | 827          | 12       | 762          | 12       |
| STB::pNZ44+Cas7i              | 2146         | 32       | 258          | 3        | 827          | 12       | 762          | 12       |
| STB::pNZ44+2CsnI              | 2146         | 32       | 258          | 3        | 827          | 12       | 762          | 12       |
| STB BIM1::pNZ44               | 2146         | 32       | 258          | 3        | 893          | 13       | 762          | 12       |
| STB BIM1::pNZ44+Csn1i         | 2146         | 32       | 258          | 3        | 893          | 13       | 762          | 12       |
| STB BIM2::pNZ44               | 2212         | 33       | 258          | 3        | 893          | 13       | 762          | 12       |
| STB BIM2::pNZ44+Cas9i         | 2212         | 33       | 258          | 3        | 893          | 13       | 762          | 12       |

Supplementary Table S7. Added spacer content of CRISPR1, 2, 3 and 4 of *S. thermophilus* STA BIM1.

| Strain   | CRISPR1                        | CRISPR2 | CRISPR3 | CRISPR4     |
|----------|--------------------------------|---------|---------|-------------|
| STA BIM1 | GGAAGACAAAGACATGACAAATCAACTATC | N/A     | N/A     | Not present |

Supplementary Table S8. Added spacer content of CRISPR1, 2, 3 and 4 of *S. thermophilus* STB BIM1 and STB BIM2.

| Strain   | CRISPR1                        | CRISPR2 | CRISPR3                        | CRISPR4 |
|----------|--------------------------------|---------|--------------------------------|---------|
| STB BIM2 | TTATCGCAGCTTCTACACGTTGCTACCACG | N/A     | TGAAATTATGGAAAATGATGATGACAGAGC | N/A     |
| STB BIM1 |                                |         | TGAAATTATGGAAAATGATGATGACAGAGC |         |

Supplementary Table S9. CRISPR spacers added by *S. thermophilus* STB as well as CRISPR-Cas silenced variants STB::pNZ44 (plasmid control), STB::pNZ44+Csn2-1i and STB::pNZ44+2Csni. CRISPR2 is presumed to be inactive in this strain, and no added spacers were detected in the CRISPR4 repeat/spacer locus.

| Parent           | BIM # | Added spacers - CRISPR1         | Added spacers - CRISPR3         | Parent                    | BIM # | Added spacers - CRISPR1        | Added spacers - CRISPR3        |
|------------------|-------|---------------------------------|---------------------------------|---------------------------|-------|--------------------------------|--------------------------------|
| <b>STB WT</b>    | 1     | TGCTAATGAAGTAGCAAACATGCTGAAGA   | N/A                             | <b>STB::pNZ44+Csn2-1i</b> | 1     | N/A                            | CCAATGACTGAAAACGACATTCGGAGGGTG |
|                  | 2     | TCTGGAAAGCATATTGAGGGAGCTACTCTT  | N/A                             |                           | 2     | N/A                            | GTTTATTACCAACAAAAGTAAAAATATA   |
|                  | 3     | GACGTTCTTAATAGTCTTCCGACATTTAT   | GCTCAATCAAGAGTATCTAGCTATCAAAA   |                           | 3     | N/A                            | CCAATGACTGAAAACGACATTCGGAGGGTG |
|                  | 4     | ACATGCTTGACCTCATTTCCTTCTCCT     | N/A                             |                           | 4     | N/A                            | CCAAAAAATTTAGCCCTAAAGCTGACAAGT |
|                  | 5     | AAAAATCAAAGGTGAGCAGATTTACGAGCT  | N/A                             |                           | 5     | N/A                            | CTTAATCCCTCTCTGCTGCTCGGTTACC   |
|                  | 6     | N/A                             | AGGTTATATTGTCGAAAATGGCAAAGCTTT  |                           | 6     | N/A                            | N/A                            |
|                  | 7     | AAATATCTACAGGTCACTACAAAGCTACGCT | AACAGCGAAAACCGTCAATTGAGTACCCTGT |                           |       |                                | N/A                            |
|                  | 8     | AAATCAGTTTTTTGTTTCAGAAACTTGTCT  | TGCTCGACTTGTTAAAAAACTACTGAAGA   |                           |       |                                |                                |
|                  | 9     | N/A                             | CTCCTTCGCTATTTTCAAACACTTTTG     |                           |       |                                |                                |
|                  | 10    | AAATCAGTTTTTTGTTTCAGAAACTTGTCT  | TCTAAATCCAAACAAGTCACAAAAACCTTT  |                           |       |                                |                                |
|                  |       | N/A                             |                                 |                           |       |                                |                                |
| <b>STB:pNZ44</b> | 1     | AAAATCAATGGAAAAAGATTGTGGAATCAA  | N/A                             | <b>STB::pNZ44+2Csni</b>   | 1     | AAATCAGTTTTTTGTTTCAGAAACTTGTCT | N/A                            |
|                  | 2     | TTTGATTCACGTTTGATAGTTGCTAAGATT  | N/A                             |                           | 2     | N/A                            | N/A                            |
|                  | 3     | TCAACAGTCTAGCAGCTTATTGGTCGTTT   | N/A                             |                           | 3     | N/A                            | N/A                            |
|                  | 4     | AAATCAGTTTTTTGTTTCAGAAACTTGTCT  | ATCAAGTTGTTAAATTCAAAAGCGACAGT   |                           | 4     | N/A                            | N/A                            |
|                  | 5     | AAAGATTGCATCATCTAAGAGGTGTTAAGT  | N/A                             |                           | 5     | N/A                            | N/A                            |
|                  | 6     | ATATTCATATCCCTGCTCATGTTTGATAG   | N/A                             |                           | 6     | N/A                            | N/A                            |
|                  | 7     | TAACTCACATGTATCTTGACCAACTGTTCT  | GTTTATTACCAACAAAAGTAAAAATATA    |                           | 7     | N/A                            | TGCTCGACTTGTTAAAAAACTACTGAAGA  |
|                  | 8     | N/A                             | TTATTGGGTGGTGAAGCGTTTGCTTATCGT  |                           | 8     | TCGTTAGAACTGGATCAACATCTAGTACA  | N/A                            |
|                  | 9     | CATACATTGGTTCGTCAATACGACTATTG   | N/A                             |                           | 9     | AAATCAGTTTTTTGTTTCAGAAACTTGTCT | N/A                            |
|                  | 10    | TTACGAATAGAAGACCACATCTCGAACG    | N/A                             |                           | 10    | TTGACGATTGGGAACCGTGAAGGAATTT   | N/A                            |
